# Supplementary material
Source: publisher figshare collection journal article supplement (https://springernature.figshare.com/ndownloader/files/40036678)
Supplement: Supplementary file 1 [file 40036678]

The online submission form is requiring me to upload data to Figshare. But *I have already done this*. The data files are available at: doi.org/10.6084/m9.figshare.22527298.v1
